# Supplementary material for: An iterative route to “decorated” ethylene glycol-based linkers
Source: Royal Society of Chemistry journal article supplement (doi:10.1039/b518061a), 2006-01-01

*Supporting Information for*

## **An Iterative Route To “Decorated” Ethylene Glycol-based Linkers**

Genliang Lu, Sang Lam and Kevin Burgess\*

*Texas A & M University, Chemistry Department, P.O. Box 30012, College Station*

*Texas 77842, USA.*

*burgess@tamu.edu*

### Table of Contents

|                                                                                                        | Page      |
|--------------------------------------------------------------------------------------------------------|-----------|
| General Experimental                                                                                   | S2        |
| Synthesis and Characterization Data for Compounds <b>1-14</b> .                                        | S2 – S10  |
| Outline of Calculations                                                                                | S11       |
| References                                                                                             | S11       |
| Copies of <sup>1</sup> H NMR and <sup>13</sup> C NMR Spectra of Compounds <b>1-3</b> and <b>5-14</b> . | S12 - S24 |

## General Experimental

Unless otherwise indicated, all NMR data were collected at room temperature in CDCl<sub>3</sub> with internal CHCl<sub>3</sub> as the reference ( $\delta$  7.27 ppm for <sup>1</sup>H and 77.00 ppm for <sup>13</sup>C). MS were measured under ESI, MALDI or APCI conditions. Analytical thin-layer chromatography (TLC) was carried out on commercial Merck silica gel 60 plates, 0.25  $\mu$ m thickness, with fluorescent indicator (F-254) or stained with aqueous KMnO<sub>4</sub> solution. Column chromatography was performed with 40-63  $\mu$ m silica gel. Tetrahydrofuran (THF) was freshly distilled from sodium/benzophenone; other solvents were used as received. Unless otherwise specified, all reactions were carried out under an atmosphere of dry nitrogen in oven-dried (at least 6 h at 140 °C) glassware.

**2-(2-{2-[2-(4-Methylbenzenesulfonyl)ethoxy]ethoxy}ethyl)isoindole-1,3-dione (2).** To a solution of 2-{2-[2-(2-hydroxyethoxy)ethoxy]ethyl}isoindole-1,3-dione<sup>1</sup> (12.00 g, 42.97 mmol), triethylamine (11.9 mL, 86.0 mmol) and trimethylamine hydrochloride (0.41 g, 4.30 mmol) in acetonitrile (100 mL) was added *p*-toluenesulfonyl chloride (12.29 g, 64.46 mmol) slowly at 0 °C under nitrogen. The mixture was stirred at 0 °C for 20 min and at room temperature for 40 min under nitrogen. The reaction mixture was poured into water, extracted with EtOAc and dried over Na<sub>2</sub>SO<sub>4</sub>. The crude product was purified by flash chromatography eluting with EtOAc/hexane (1 : 3) and EtOAc/hexane (1 : 1) to afford **2** (17.81 g, 96%) as a pale yellow oil. <sup>1</sup>H NMR (500 MHz, CDCl<sub>3</sub>)  $\delta$  7.84 (dd, *J* = 5.5, 3.0 Hz, 2 H), 7.78 (d, *J* = 7.0 Hz, 2 H), 7.71 (dd, *J* = 5.5, 3.0 Hz, 2 H), 7.33 (d, *J* = 7.5 Hz, 2 H), 4.09 (t, *J* = 4.8 Hz, 2 H), 3.87 (t, *J* = 5.8 Hz, 2 H), 3.69 (t, *J* = 6.0 Hz, 2 H), 3.62 (t, *J* = 4.8 Hz, 2 H), 3.58-3.56 (m, 2 H), 3.53-3.51 (m, 2 H), 2.44 (s, 3 H); <sup>13</sup>C NMR

(125 MHz, CDCl<sub>3</sub>)  $\delta$  168.2, 144.7, 133.9, 132.9, 132.0, 129.8, 127.9, 123.2, 70.6, 70.0, 69.1, 68.6, 67.9, 37.2, 21.6; HRMS (ESI) calcd for C<sub>21</sub>H<sub>24</sub>NO<sub>7</sub>S (M+H)<sup>+</sup> 434.1273, found 434.1244.

**General Procedure for the Synthesis of TEG Linkers 1, 6, 8 and 10.** To a solution of tosylate (1.0 mmol) in acetonitrile was added sodium azide (3.0-5.0 mmol). The mixture was refluxed for 40-48 h under N<sub>2</sub>. The suspension was cooled, diluted with water and extracted with CH<sub>2</sub>Cl<sub>2</sub>. The combined organic layers were dried over MgSO<sub>4</sub> and evaporated to yield TEG linkers as yellow oils.

**2-[2-[2-(2-Azidoethoxy)ethoxy]ethyl]isoindoline-1,3-dione (1).** Treatment of **2** (6.502 g, 15.00 mmol) and sodium azide (2.925 g, 45.00 mmol) in acetonitrile (35 mL) for 48 h afforded **1** (4.16 g, 91%) as a pale yellow oil. <sup>1</sup>H NMR (500 MHz, CDCl<sub>3</sub>)  $\delta$  7.85 (dd, *J* = 5.5, 3.0 Hz, 2 H), 7.72 (dd, *J* = 5.5, 3.0 Hz, 2 H), 3.91 (t, *J* = 4.5 Hz, 2 H), 3.76 (t, *J* = 4.8 Hz, 2 H), 3.67-3.65 (m, 2 H), 3.63-3.61 (m, 4 H), 3.31 (t, *J* = 5.0 Hz, 2 H); <sup>13</sup>C NMR (125 MHz, CDCl<sub>3</sub>)  $\delta$  168.2, 133.9, 132.1, 123.2, 70.6, 70.1, 70.0, 68.0, 50.6, 37.2; MS (APCI, *m/z*) 305 (M+H)<sup>+</sup>; HRMS (ESI) calcd for C<sub>14</sub>H<sub>16</sub>N<sub>4</sub>O<sub>4</sub> (M+H)<sup>+</sup> 305.1250, found 305.1239.

**2-[2-(2-{2-[4-({2-[2-(2-Azidoethoxy)ethoxy]ethoxy)methyl]-1*H*-1,2,3-triazol-1-yl]ethoxy}ethoxy)ethyl]isoindoline-1,3-dione (6).** Treatment of **5** (3.90 g, 6.0 mmol) and sodium azide (1.17 g, 18.0 mmol) in acetonitrile (40 mL) for 40 h afforded **6** (2.89 g, 93%) as a yellow oil. <sup>1</sup>H NMR (500 MHz, CDCl<sub>3</sub>)  $\delta$  7.85 (dd, *J* = 5.0, 3.0 Hz, 2 H), 7.73 (s, 1 H), 7.73 (dd, *J* = 5.0, 3.0 Hz, 2 H), 4.69 (s, 2 H), 4.47 (t, *J* = 5.0 Hz, 2 H), 3.91 (t, *J* = 5.5 Hz, 2 H), 3.81 (t, *J* = 5.0 Hz, 2 H), 3.73 (t, *J* = 5.0 Hz, 2 H), 3.72-3.66 (m, 10 H), 3.63-3.61 (m, 2 H), 3.58-3.55 (m, 2 H), 3.38 (t, *J* = 5.0 Hz, 2 H); <sup>13</sup>C NMR (125 MHz,

CDCl<sub>3</sub>) δ 168.2, 144.9, 140.0, 132.0, 123.8, 123.2, 70.63, 70.59, 70.57, 70.48, 70.0, 69.9, 69.6, 69.4, 68.0, 64.5, 50.6, 50.1, 37.2, several signals account for more than one carbon; MS (MALDI, m/z) 540 (M+Na)<sup>+</sup>; HRMS (ESI) calcd for C<sub>23</sub>H<sub>32</sub>N<sub>7</sub>O<sub>7</sub> (M+H)<sup>+</sup> 518.2363, found 518.2360.

**2-(2-{2-[2-(4-{[2-(2-{2-[4-({2-[2-(2-Azidoethoxy)ethoxy]ethoxy)methyl}-1H-1,2,3-triazol-1-yl]ethoxy}ethoxy)ethoxy)methyl]-1H-1,2,3-triazol-1-yl]ethoxy}ethoxy)ethoxy)methyl}-1H-1,2,3-triazol-1-yl]ethoxy}ethoxy)ethyl)isoindoline-1,3-dione (8).** Treatment of **7** (2.15 g, 2.50 mmol) and sodium azide (0.488 g, 7.5 mmol) in acetonitrile (13 mL) for 40 h afforded **8** (1.758 g, 96%) as a yellow oil. <sup>1</sup>H NMR (500 MHz, CDCl<sub>3</sub>) δ 7.81 (dd, *J* = 5.5, 3.0 Hz, 2 H), 7.72 (s, 1 H), 7.70 (s, 1 H), 7.70 (dd, *J* = 5.5, 3.0 Hz, 2 H), 4.65 (s, 4 H), 4.50 (t, *J* = 5.0 Hz, 2 H), 4.44 (t, *J* = 5.0 Hz, 2 H), 3.87 (t, *J* = 5.8 Hz, 2 H), 3.84 (t, *J* = 5.0 Hz, 2 H), 3.78 (t, *J* = 5.0 Hz, 2 H), 3.71-3.53 (m, 24 H), 3.36 (t, *J* = 5.3 Hz, 2 H); <sup>13</sup>C NMR (125 MHz, CDCl<sub>3</sub>) δ 168.2, 144.8, 144.7, 134.0, 132.0, 123.76, 123.74, 123.2, 70.56, 70.52, 70.50, 70.43, 70.40, 70.37, 69.9, 69.8, 69.54, 69.49, 69.38, 69.36, 67.9, 64.5, 64.4, 50.6, 50.1, 50.0, 37.1, several signals account for more than one carbon; MS (MALDI, m/z) 731 (M+Na)<sup>+</sup>; HRMS (ESI) calcd for C<sub>32</sub>H<sub>47</sub>N<sub>10</sub>O<sub>10</sub> (M+H)<sup>+</sup> 731.3477, found 731.3481.

**2-{2-[2-(2-{4-[(2-{2-[2-(4-{[2-(2-{2-[4-({2-[2-(2-Azidoethoxy)ethoxy]ethoxy)methyl}-1H-1,2,3-triazol-1-yl]ethoxy}ethoxy)ethoxy)methyl]-1H-1,2,3-triazol-1-yl]ethoxy}ethoxy)ethoxy)methyl]-1H-1,2,3-triazol-1-yl]ethoxy}ethoxy)ethyl}isoindoline-1,3-dione (10).** Treatment of **9** (0.215 g, 0.20 mmol) and sodium azide (0.065 g, 1.0 mmol) in acetonitrile (4 mL) for 40 h afforded **10** (0.145 g, 77%) as a yellow oil. <sup>1</sup>H NMR (500 MHz, CDCl<sub>3</sub>) δ 7.82 (dd, *J* = 5.5, 3.0 Hz, 2 H), 7.72-7.69 (m, 5 H), 4.64 (s, 4 H), 4.63 (s, 2 H), 4.50 (t, *J* = 5.0 Hz, 4 H), 4.44 (t, *J* = 5.0 Hz, 2 H), 3.87 (t, *J* = 5.8 Hz, 2 H), 3.84 (t,

$J = 5.0$  Hz, 4 H), 3.78 (t,  $J = 5.0$  Hz, 2 H), 3.71-3.51 (m, 32 H), 3.36 (t,  $J = 5.0$  Hz, 2 H);  $^{13}\text{C}$  NMR (125 MHz,  $\text{CDCl}_3$ )  $\delta$  168.2, 144.8, 144.7, 134.0, 132.0, 128.5, 125.9, 123.82, 123.79, 123.2, 70.61, 70.57, 70.55, 70.48, 70.46, 70.42, 70.0, 69.9, 69.6, 69.5, 69.42, 69.41, 68.0, 64.5, 64.44, 64.43, 50.6, 50.15, 50.12, 37.1, several signals account for more than one carbon; HRMS (ESI) calcd for  $\text{C}_{41}\text{H}_{62}\text{N}_{13}\text{O}_{13}$  ( $\text{M}+\text{H}$ ) $^+$  944.4584, found 944.4586.

**2-[2-[2-(Prop-2-ynyloxy)ethoxy]ethoxy]ethanol (4)<sup>2</sup>**. To a solution of triethylene glycol (15.02 g, 100 mmol) in distilled THF (75 mL) at 0 °C under nitrogen was added sodium hydride (2.60 g, 65 mmol, 60%) slowly. The mixture was stirred at 0 °C for 30 min under nitrogen. Propargyl bromide (5.40 mL, 7.44 g, 50 mmol) was injected slowly to the reaction flask. The mixture was stirred at 0 °C for 2 h and at 25 °C for 20 h. The mixture was poured into water, extracted with  $\text{CH}_2\text{Cl}_2$  and dried over  $\text{Na}_2\text{SO}_4$ . The crude product was purified by flash chromatography eluting with EtOAc/hexane (3 : 2) to afford **4** as a yellow oil (7.102 g, 75%).  $^1\text{H}$  NMR (500 MHz,  $\text{CDCl}_3$ )  $\delta$  4.19 (d,  $J = 2.5$  Hz, 2H), 3.71 (t,  $J = 6.0$  Hz, 2H), 3.60-3.70 (m, 8H), 3.59 (t,  $J = 5.5$  Hz, 2H), 2.61 (s, 1H), 2.43 (t,  $J = 2.5$  Hz, 1H);  $^{13}\text{C}$  NMR (125 MHz,  $\text{CDCl}_3$ )  $\delta$  79.5, 74.6, 72.4, 70.5, 70.3, 70.2, 69.0, 61.6, 58.3.

**2-[2-[2-(Prop-2-ynyloxy)ethoxy]ethoxy]ethyl 4-methylbenzenesulfonate (3)**. To a solution of **4** (10.28 g, 54.62 mmol), triethylamine (19.0 mL, 136.5 mmol) and trimethylamine hydrochloride (0.522 g, 5.46 mmol) in acetonitrile (140 mL) was added *p*-toluenesulfonyl chloride (20.82 g, 109.24 mmol) slowly at 0 °C under nitrogen. The mixture was stirred at 0 °C for 50 minutes and at room temperature for 30 min under nitrogen. The reaction mixture was poured into water, extracted with EtOAc and dried over  $\text{MgSO}_4$ . The crude product was purified by flash chromatography eluting with

EtOAc/hexane (1 : 3) to afford **3** (16.19 g, 87%) as a yellow oil.  $^1\text{H}$  NMR ( $\text{CDCl}_3$ , 500 MHz)  $\delta$  7.79 (d,  $J = 8.5$  Hz, 2 H), 7.34 (d,  $J = 8.5$  Hz, 2 H), 4.19 (d,  $J = 2.0$  Hz, 2H), 4.15 (t,  $J = 5.0$  Hz, 2H), 3.67-3.69 (m, 4H), 3.64-3.65 (m, 2H), 3.59 (s, 4H), 2.45 (s, 3H), 2.43 (t,  $J = 2.5$  Hz, 1H);  $^{13}\text{C}$  NMR ( $\text{CDCl}_3$ , 125 MHz)  $\delta$  144.7, 132.9, 129.8, 127.9, 79.6, 74.5, 70.7, 70.5, 70.4, 69.2, 69.0, 68.6, 58.3, 21.6; MS (APCI,  $m/z$ ) 365 ( $\text{M}+\text{Na}$ ) $^+$ ; HRMS (ESI) calcd for  $\text{C}_{16}\text{H}_{23}\text{O}_6\text{S}$  ( $\text{M}+\text{H}$ ) $^+$  343.1215, found 343.1194.

**General Procedure for the Synthesis of TEG Linkers 5, 7, 9, 13 and 14.** To a solution of azide **1** (**6**, **8** or **10**) (1.0 mmol) and alkyne (1.0-1.3 mmol) in THF (2.5 mL) under nitrogen was added copper turnings (0.064 g),  $\text{H}_2\text{O}$  (2.5 mL) and  $\text{CuSO}_4$  (0.20 mL, 0.20 mmol, 1.0 N in  $\text{H}_2\text{O}$ ). The reaction mixture was stirred at 25 °C under nitrogen for 17-48 h. The solvents were removed under reduced pressure and the crude product was purified by flash chromatography over silica to afford TEG Linkers as yellow oils.

**2-{2-[2-(2-{4-[(2-{2-[2-(4-Methylbenzenesulfonyl)ethoxy]ethoxy)ethoxy)methyl]-1H-1,2,3-triazol-1-yl}ethoxy)ethoxy]ethyl}isoindoline-1,3-dione (**5**).** Treatment of **1** (1.826 g, 6.00 mmol) and **3** (2.67 g, 7.80 mmol) for 20 h according to the general procedure described above, eluting with EtOAc/hexane (3 : 1) and EtOAc to afford **5** (3.90 g, 100 %) as a yellow oil.  $^1\text{H}$  NMR ( $\text{CDCl}_3$ , 500 MHz)  $\delta$  7.85 (dd,  $J = 5.0, 3.0$  Hz, 2 H), 7.79 (d,  $J = 8.5$  Hz, 2 H), 7.75 (s, 1 H), 7.73 (dd,  $J = 5.5, 3.0$  Hz, 2 H), 7.34 (d,  $J = 8.5$  Hz, 2 H), 4.68 (s, 2 H), 4.46 (t,  $J = 5.3$  Hz, 2 H), 4.15 (t,  $J = 5.0$  Hz, 2 H), 3.90 (t,  $J = 5.8$  Hz, 2 H), 3.80 (t,  $J = 5.0$  Hz, 2 H), 3.72 (t,  $J = 5.8$  Hz, 2 H), 3.67-3.70 (m, 4 H), 3.61-3.64 (m, 2 H), 3.56-3.60 (m, 8 H), 2.45 (s, 3 H);  $^{13}\text{C}$  NMR ( $\text{CDCl}_3$ , 125 MHz)  $\delta$  168.2, 144.8, 134.0, 132.9, 132.0, 129.8, 127.9, 123.9, 123.2, 70.7, 70.52, 70.49, 70.48, 69.9, 69.6, 69.4, 69.2, 68.6, 68.0, 64.4, 50.8, 50.2, 37.2, 21.6, several signals account for

more than one carbon; MS (ESI, m/z) 647 (M+H)<sup>+</sup>; HRMS (ESI) calcd for C<sub>30</sub>H<sub>39</sub>N<sub>4</sub>O<sub>10</sub>S (M+H)<sup>+</sup> 647.2387, found 647.2396.

**2-[2-(2-{2-[4-({2-[2-(2-{4-[(2-[2-(4-Methylbenzenesulfonyl)ethoxy]ethoxy)ethoxy)methyl]-1*H*-1,2,3-triazol-1-yl]ethoxy)ethoxy]ethoxy)methyl]-1*H*-1,2,3-triazol-1-yl]ethoxy)ethoxy)ethyl]isoindoline-1,3-dione (7).** Treatment of **6** (1.035 g, 2.00 mmol) and **3** (0.684 g, 2.0 mmol) for 20 h according to the general procedure described above, eluting with EtOAc/MeOH (10 : 1) and EtOAc/MeOH (10/2) to afford **7** (1.457 g, 85 %) as a yellow oil. <sup>1</sup>H NMR (CDCl<sub>3</sub>, 300 MHz) δ 7.84 (dd, *J* = 6.0 Hz, 3.0 Hz, 2 H), 7.79 (d, *J* = 8.4 Hz, 2 H), 7.75 (s, 1 H), 7.73 (s, 1 H), 7.72 (dd, *J* = 6.0 Hz, 3.5 Hz, 2 H), 7.33 (d, *J* = 8.5 Hz, 2H), 4.67 (s, 2 H), 4.66 (s, 2 H), 4.52 (t, *J* = 5.0 Hz, 2 H), 4.45 (t, *J* = 5.0 Hz, 2 H), 4.17-4.14 (m, 2 H), 3.91-3.86 (m, 4 H), 3.80 (t, *J* = 5.3 Hz, 2 H), 3.70-3.55 (m, 24 H), 2.44 (s, 3H); <sup>13</sup>C NMR (CDCl<sub>3</sub>, 125 MHz) δ 168.2, 144.8, 144.7, 134.0, 132.9, 132.0, 129.8, 128.4, 127.9, 125.8, 123.8, 123.2, 70.6, 70.45, 70.43, 70.41, 70.37, 69.8, 69.5, 69.4, 69.2, 68.6, 67.9, 64.5, 64.4, 50.11, 50.09, 37.2, 21.6, several signals account for more than one carbon; MS (MALDI, m/z) 860 (M+Na)<sup>+</sup>; HRMS (ESI) calcd for C<sub>39</sub>H<sub>54</sub>N<sub>7</sub>O<sub>13</sub>S (M+H)<sup>+</sup> 860.3500, found 860.3496.

**2-(2-{2-[2-(4-{[2-(2-{2-[4-({2-[2-(2-{4-[(2-[2-(4-Methylbenzenesulfonyl)ethoxy]ethoxy)ethoxy)methyl]-1*H*-1,2,3-triazol-1-yl]ethoxy)ethoxy]ethoxy)methyl]-1*H*-1,2,3-triazol-1-yl]ethoxy)ethoxy]ethoxy)methyl]-1*H*-1,2,3-triazol-1-yl]ethoxy)ethoxy)ethyl]isoindoline-1,3-dione (9).** Treatment of **8** (0.730 g, 1.00 mmol) and **3** (0.445 g, 1.3 mmol) for 42 h according to the general procedure described above, eluting with CHCl<sub>3</sub>/MeOH (95 : 5) to afford **9** (0.854 g, 80 %) as a yellow oil. <sup>1</sup>H NMR (500 MHz, CDCl<sub>3</sub>) δ 7.83 (dd, *J* = 5.5, 3.0 Hz, 2 H), 7.77 (d, *J* = 8.5 Hz, 2 H), 7.74 (s, 1

H), 7.73 (s, 1 H), 7.71 (s, 1 H), 7.71 (dd,  $J = 5.5, 3.0$  Hz, 2 H), 7.32 (d,  $J = 8.5$  Hz, 2 H), 4.66 (s, 2 H), 4.64 (s, 4 H), 4.51 (t,  $J = 5.3$  Hz, 4 H), 4.45 (t,  $J = 5.0$  Hz, 2 H), 4.13 (t,  $J = 4.8$  Hz, 2 H), 3.88 (t,  $J = 5.8$  Hz, 2 H), 3.85 (t,  $J = 5.3$  Hz, 4 H), 3.79 (t,  $J = 5.3$  Hz, 2 H), 3.71 (t,  $J = 5.8$  Hz, 2H), 3.69-3.65 (m, 8 H), 3.62-3.59 (m, 16 H), 3.56-3.54 (m, 6 H), 2.43 (s, 3 H);  $^{13}\text{C}$  NMR (125 MHz,  $\text{CDCl}_3$ )  $\delta$  168.2, 144.8, 144.7, 134.0, 132.9, 132.0, 129.8, 127.9, 123.8, 123.2, 70.7, 70.48, 70.46, 70.45, 70.40, 69.9, 69.5, 69.4, 69.2, 68.6, 68.0, 64.5, 64.49, 64.44, 64.43, 50.15, 50.12, 37.2, 21.6, several signals account for more than one carbon; MS (MALDI,  $m/z$ ) 1095.5 ( $\text{M}+\text{Na}$ ) $^+$ ; HRMS (ESI) calcd for  $\text{C}_{48}\text{H}_{69}\text{N}_{10}\text{O}_{16}\text{S}$  ( $\text{M}+\text{H}$ ) $^+$  1073.4614, found 1073.4664.

***tert*- Butyl 2-{2-[2-(2-{[1-(2-{2-[2-(1,3-dioxo-1,3-dihydro-2*H*-isoindol-2-yl)ethoxy]ethoxy}ethyl)-1*H*-1,2,3-triazol-4-yl]methoxy}ethoxy)ethoxy]ethoxy}acetate (13).**

Treatment of **6** (0.525 g, 1.015 mmol) and **12** (0.393 g, 1.3 mmol) for 17 h according to the general procedure described above, eluting with  $\text{CHCl}_3/\text{MeOH}$  (95 : 5) to afford **13** (0.760 g, 91 %) as a yellow oil.  $^1\text{H}$  NMR (500 MHz,  $\text{CDCl}_3$ )  $\delta$  7.83 (dd,  $J = 5.5, 3.0$  Hz, 2 H), 7.81 (s, 1 H), 7.72 (s, 1 H), 7.71 (dd,  $J = 5.5, 3.0$  Hz, 2 H), 4.66 (brs, 4 H), 4.53 (brs, 2 H), 4.46 (t,  $J = 4.8$  Hz, 2 H), 4.01 (s, 2 H), 3.89-3.85 (m, 4 H), 3.80 (t,  $J = 5.0$  Hz, 2 H), 3.71-3.54 (m, 26 H), 1.46 (s, 9 H);  $^{13}\text{C}$  NMR (125 MHz,  $\text{CDCl}_3$ )  $\delta$  169.6, 168.2, 134.0, 132.0, 123.2, 81.4, 70.6, 70.5, 70.46, 70.42, 70.40, 69.8, 69.6, 69.5, 68.9, 67.9, 64.4, 50.3, 37.1, 28.0, several signals account for more than one carbon; HRMS (ESI) calcd for  $\text{C}_{38}\text{H}_{58}\text{N}_7\text{O}_{13}$  ( $\text{M}+\text{H}$ ) $^+$  820.4093, found 820.4077.

**5-[2-(2-{2-[[1-(2-(2-{2-[(1-(2-{2-[2-(1,3-Dioxo-1,3-dihydro-2*H*-isoindol-2-yl)ethoxy]ethoxy}ethyl)-1*H*-1,2,3-triazol-4-yl]methoxy}ethoxy)ethoxy]ethyl)-1*H*-1,2,3-triazol-4-yl]methoxy]ethoxy]ethoxy]ethyl]-1*H*-1,2,3-triazol-4-yl]methoxy]-**



**ethoxy}ethoxy)ethyl]-1*H*-1,2,3-triazol-4-yl]pentanoic acid (14).** Treatment of **10** (0.110 g, 0.117 mmol), 6-heptynoic acid (0.044 g, 0.350 mmol), copper turnings (20 mg), CuSO<sub>4</sub> (0.10 mL, 1 N), THF (2 mL) and water (2 mL) for 48 h according to the general procedure described above, eluting with MeOH to afford **14** (0.030 g, 24 %) as a yellow oil. <sup>1</sup>H NMR (500 MHz, CDCl<sub>3</sub>) δ 7.83 (dd, *J* = 5.5, 3.5 Hz, 2 H), 7.78 (s, 1 H), 7.74 (s, 1 H), 7.73 (s, 1 H), 7.71 (dd, *J* = 5.5, 3.5 Hz, 2 H), 7.55 (s, 1 H), 4.68 (s, 2H), 4.67 (s, 2 H), 4.66 (s, 2 H), 4.54-4.51 (m, 4 H), 4.49 (t, *J* = 5.5 Hz, 2 H), 4.46 (t, *J* = 5.0 Hz, 2 H), 3.89 (t, *J* = 5.8 Hz, 2 H), 3.86 (t, *J* = 4.8 Hz, 4 H), 3.83 (t, *J* = 4.8 Hz, 2 H), 3.79 (t, *J* = 5.3 Hz, 2 H), 3.71 (t, *J* = 5.8 Hz, 2 H), 3.70-3.66 (m, 6 H), 3.63-3.54 (m, 22 H), 2.74 (t, *J* = 6.8 Hz, 2 H), 2.37 (t, *J* = 6.8 Hz, 2 H), 1.76-1.67 (m, 4 H); <sup>13</sup>C NMR (125 MHz, CDCl<sub>3</sub>) δ 175.7, 168.2, 147.6, 144.7, 144.5, 134.0, 132.0, 124.2, 123.9, 123.2, 122.2, 70.6, 70.45, 70.42, 70.40, 70.37, 69.9, 69.5, 69.4, 69.39, 69.38, 69.33, 68.0, 64.36, 64.31, 64.0, 50.3, 50.2, 50.1, 37.2, 33.7, 28.6, 25.3, 24.3, several signals account for more than one carbon; MS (MALDI, *m/z*) 1070.7 (M+Na)<sup>+</sup>; HRMS (ESI) calcd for C<sub>48</sub>H<sub>72</sub>N<sub>13</sub>O<sub>15</sub> (M+H)<sup>+</sup> 1070.5271, found 1070.5255.

***tert*-Butyl 2-(2-{2-[2-(prop-2-ynoxy)ethoxy]ethoxy}ethoxy)acetate (12).** To a solution of **4** (2.823 g, 15.00 mmol) in distilled THF (30 mL) at 0 °C under nitrogen was added sodium hydride (0.84 g, 21.0 mmol, 60%) slowly. The mixture was stirred at 0 °C for 30 min. under nitrogen. *tert*-Butyl bromoacetate (4.43 mL, 5.85 g, 30.0 mmol) was injected slowly to the reaction flask. The mixture was stirred at 0 °C for 1 h and at 25 °C for 12 h. The mixture was poured into water, extracted with CH<sub>2</sub>Cl<sub>2</sub> and dried over MgSO<sub>4</sub>. The crude product was purified by flash chromatography eluting with EtOAc/hexane (1 : 1) to afford **12** as a yellow oil (2.40 g, 53%). <sup>1</sup>H NMR (CDCl<sub>3</sub>, 300

MHz)  $\delta$  4.21 (d,  $J = 2.7$  Hz, 2 H), 4.03 (s, 2 H), 3.73-3.66 (m, 12 H), 2.43 (t,  $J = 2.3$  Hz, 1 H), 1.48 (s, 9 H);  $^{13}\text{C}$  NMR ( $\text{CDCl}_3$ , 125 MHz)  $\delta$  169.7, 81.5, 79.6, 74.5, 70.7, 70.59, 70.57 (two carbons), 70.4, 69.1, 69.0, 58.4, 28.1; HRMS (ESI) calcd for  $\text{C}_{15}\text{H}_{26}\text{Na}$  ( $\text{M}+\text{Na}$ ) $^+$  325.1627, found 325.1637.

***tert*- Butyl 3-{2-[2-(2-{[1-(2-{2-[2-(1,3-dioxo-1,3-dihydro-2*H*-isoindol-2-yl)ethoxy]ethoxy}ethyl)-1*H*-1,2,3-triazol-4-yl]methoxy}ethoxy)ethoxy]ethyl}tetrahydro-pyrimidine-1(2*H*)-carboxylate (11).** To a solution of **5** (0.200 g, 0.309 mmol) and mono-Boc-piperazine<sup>3</sup> (0.058 g, 0.309 mmol) in  $\text{CH}_3\text{CN}$  (4 mL) under nitrogen was added  $\text{K}_2\text{CO}_3$  (0.21 g, 1.55 mmol). The mixture was refluxed for 20 h. The suspension was cooled, diluted with water, extracted with  $\text{CH}_2\text{Cl}_2$  and dried over  $\text{MgSO}_4$ . The solvents were removed under reduced pressure and the crude product was purified by flash chromatography over silica eluting with MeOH to afford **11** (0.12 g, 59%) as a yellow oil.  $^1\text{H}$  NMR (500 MHz,  $\text{CDCl}_3$ )  $\delta$  7.83 (dd,  $J = 5.5, 3.0$  Hz, 2 H), 7.72 (s, 1 H), 7.71 (dd,  $J = 5.5, 3.0$  Hz, 2 H), 4.67 (s, 2 H), 4.45 (t,  $J = 5.0$  Hz, 2 H), 3.89 (t,  $J = 5.8$  Hz, 2 H), 3.79 (t,  $J = 5.3$  Hz, 2 H), 3.71 (t,  $J = 5.8$  Hz, 2 H), 3.70-3.59 (m, 12 H), 3.56-3.54 (m, 2 H), 3.43 (t,  $J = 4.8$  Hz, 4 H), 2.61 (t,  $J = 5.5$  Hz, 2 H), 2.46 (brs, 4 H), 1.44 (s, 9 H);  $^{13}\text{C}$  NMR (125 MHz,  $\text{CDCl}_3$ )  $\delta$  168.2, 154.6, 144.8, 133.9, 132.0, 123.7, 123.2, 79.5, 70.46, 70.43 (two carbons), 70.3, 69.8, 69.5, 69.4, 68.6, 67.9, 64.5, 57.7, 53.2, 50.1, 43.8, 37.1, 28.3; HRMS (ESI) calcd for  $\text{C}_{32}\text{H}_{49}\text{N}_6\text{O}_9$  ( $\text{M}+\text{H}$ ) $^+$  661.3561, found 661.3543.

## Outline of Approach for Calculations

The following approach was used to obtain estimates of molecular lengths for the extended conformations of the linkers. The molecules were drawn in Chem3D (CambridgeSoft Corp.) in extended forms, then minimized with their molecular mechanics routine. End-to-end lengths of the molecules were measured using the ruler function in Chem3D.

## References

1. Sato, H.; Hayashi, E.; Yamada, N.; Yatagai, M.; Takahara, Y. *Bioconjugate Chem.* **2001**, *12*, 701-710.
2. (a) Hansen, T. M.; Engler, M. M.; Forsyth, C. J. *Bioorg. Med. Chem. Lett.* **2003**, *13*, 2127-2130; (b) Fujii, K.; Hatano, K.; Nakamura, K.; Umeyama, H. Jpn. Kokai Tokkyo Koho, **2001**, JP 2001064238. (c) Fujii, K.; Hatano, K.; Oka, A. Jpn. Kokai Tokkyo Koho, **2000**, JP 2000355505.
3. (a) Wallen, E. A. A.; Christiaans, J. A. M.; Jarho, E. M.; Forsberg, M. M.; Venalainen, J. I.; Mannisto, P. T.; Gynther, J. *J. Med. Chem.* **2003**, *46*, 4543-4551.  
(b) Carpino, L. A.; Mansour, E. M. E.; Cheng, C. H.; Williams, J. R.; MacDonald, R.; Knapczyk, J.; Carman, M. *J. Org. Chem.* **1983**, *48*, 661-665.

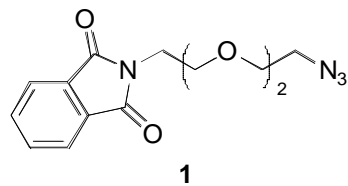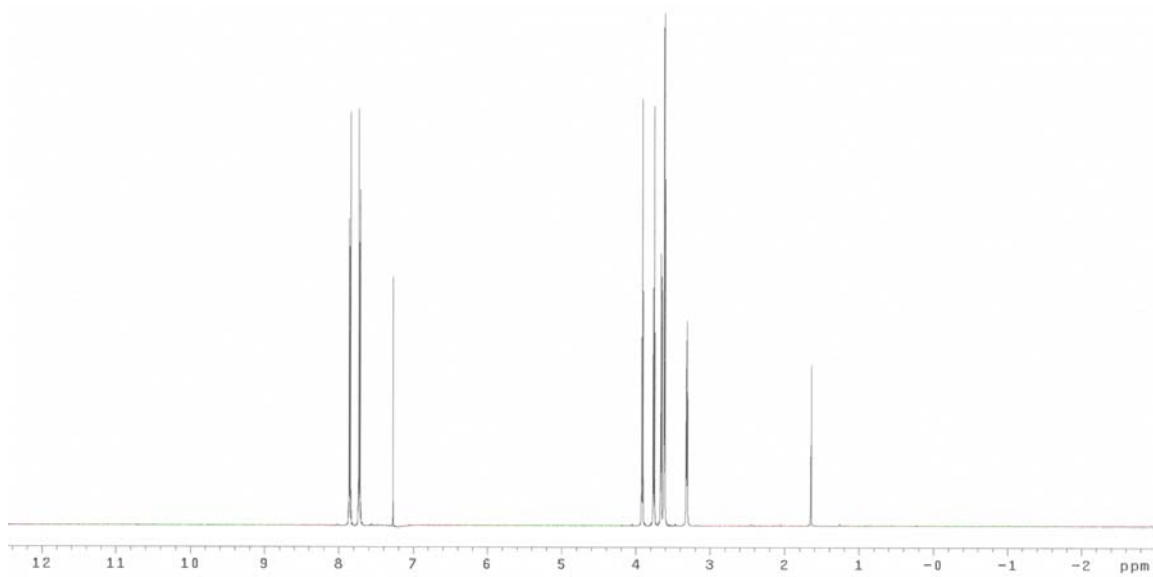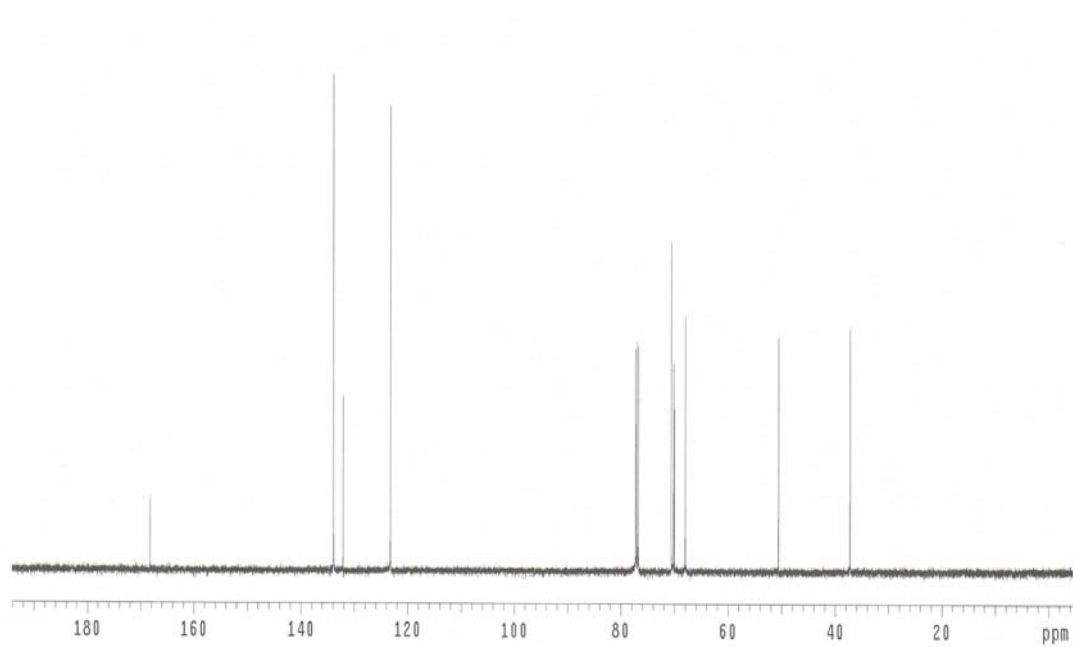

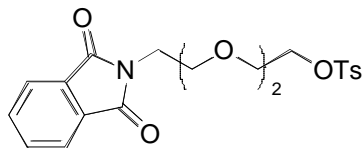

2

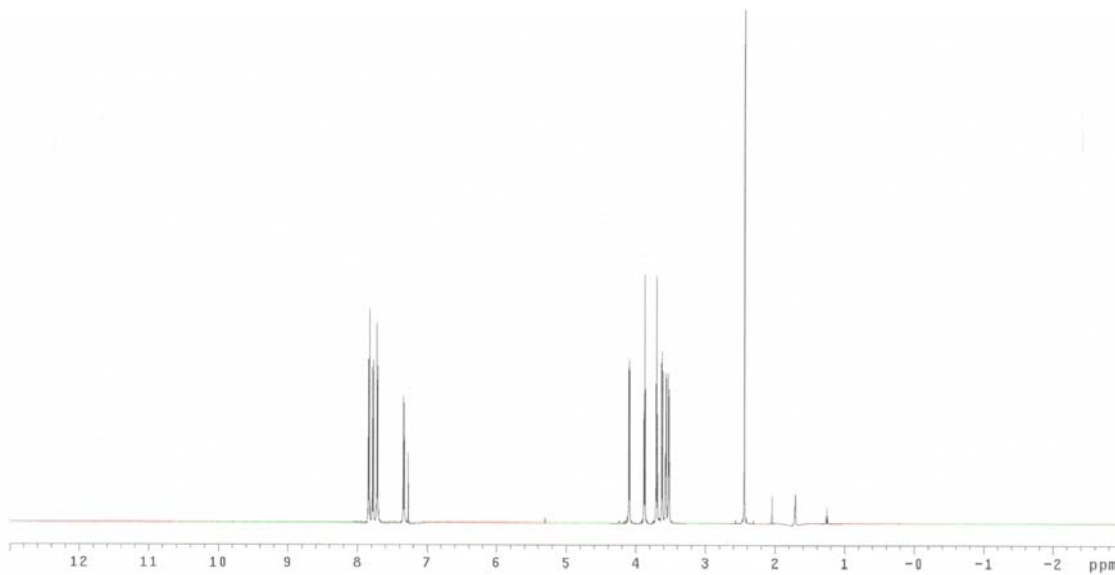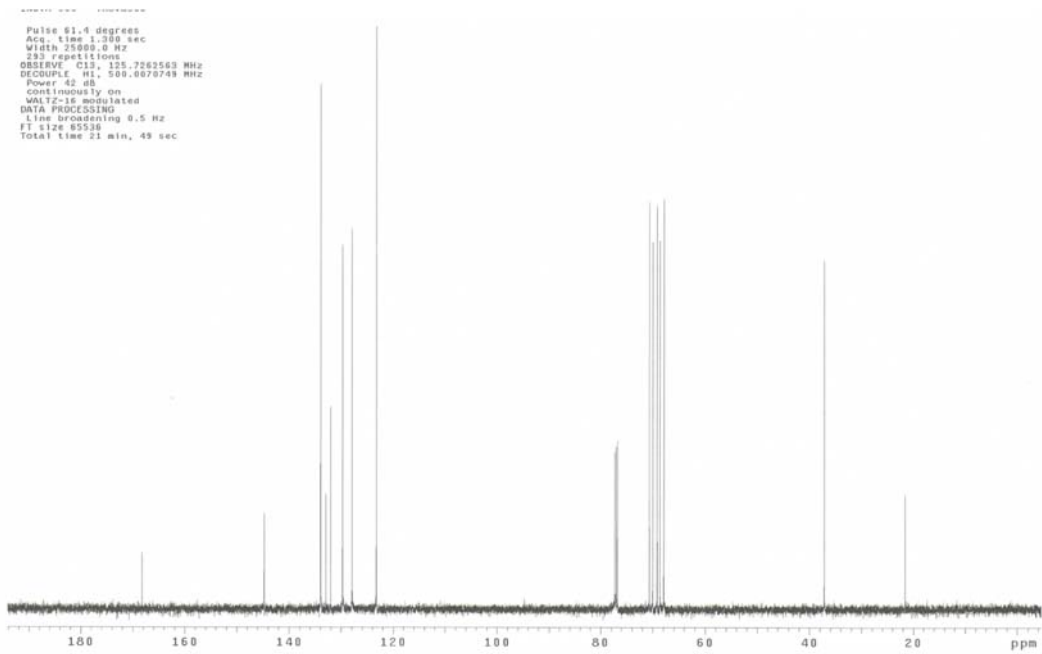

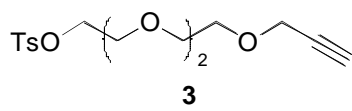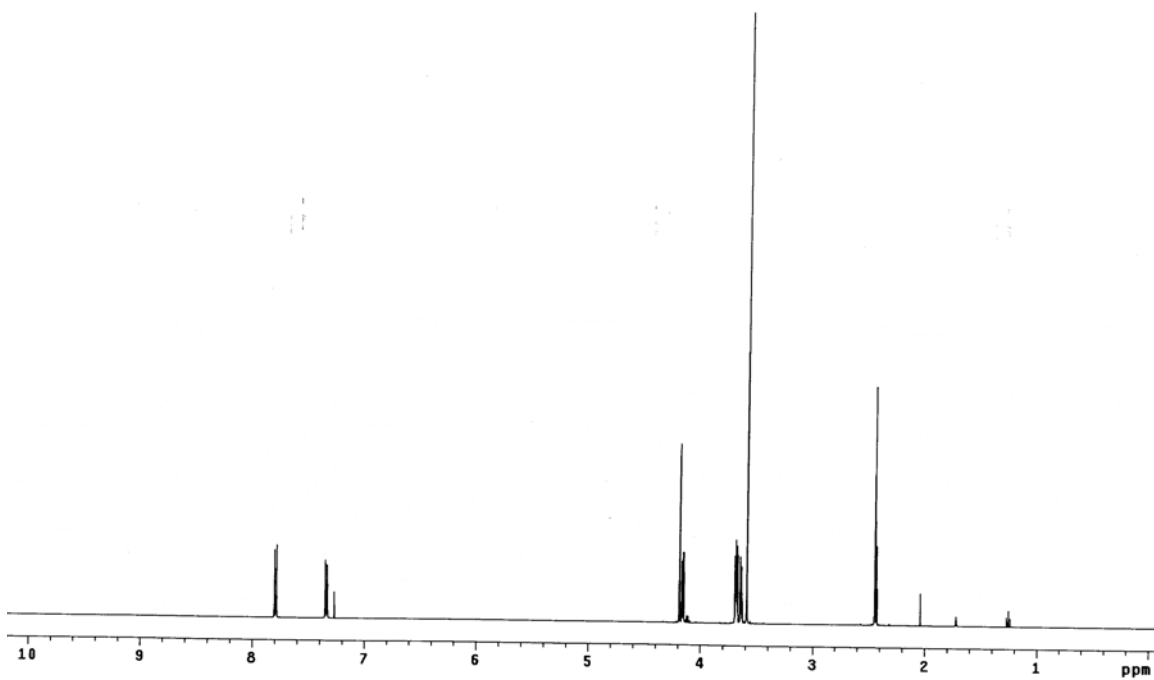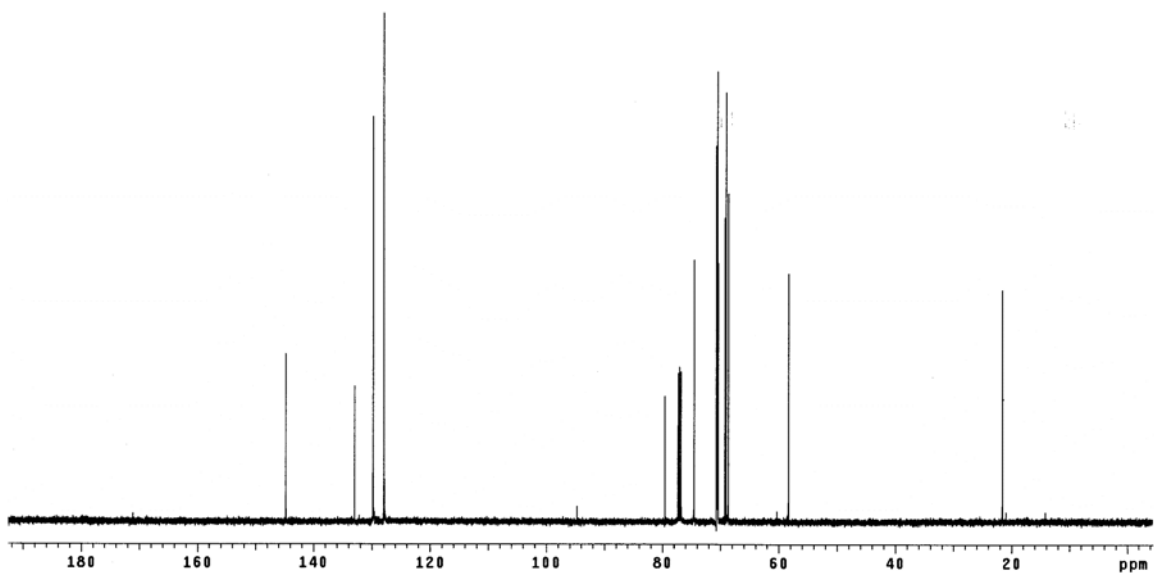

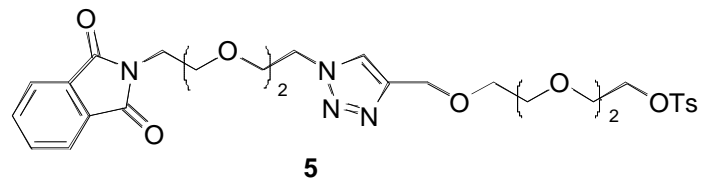

```

=====
Solvent: cdcl3
Ambient temperature
INOVA-300 "inova300"

Pulse 67.0 degrees
Acq. time 3.744 sec
Width 4000.0 Hz
16 repetitions
OBSERVE H1, 299.9579328 MHz
DATA PROCESSING
FT size 32768
Total time 1 min, 0 sec

```

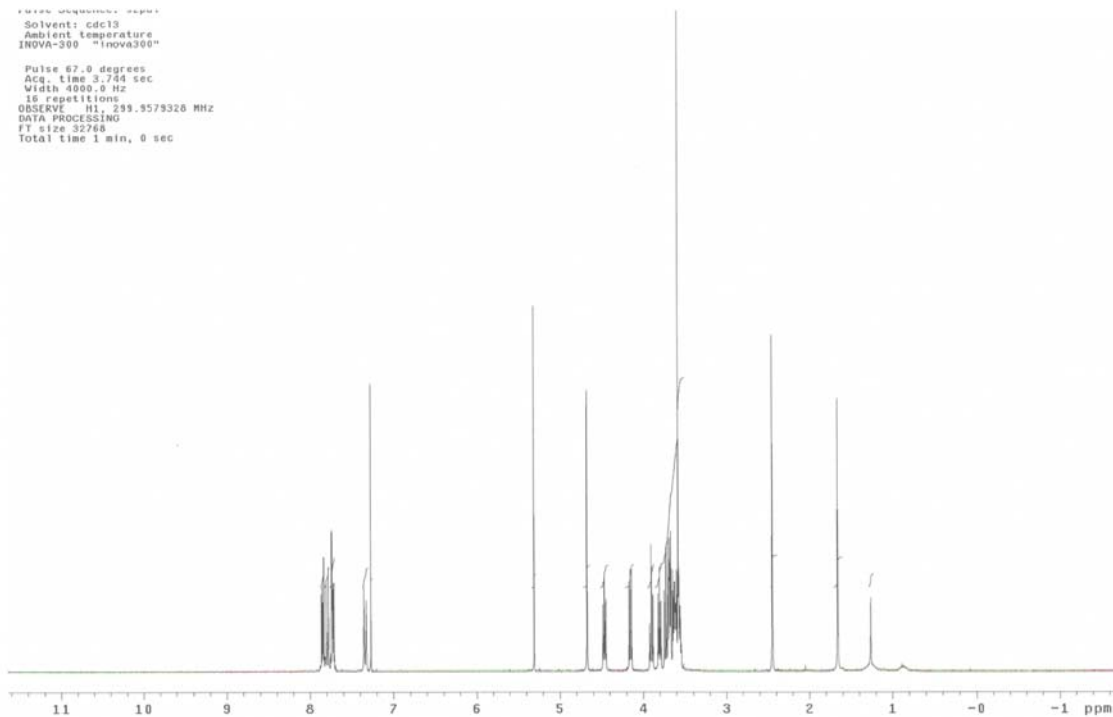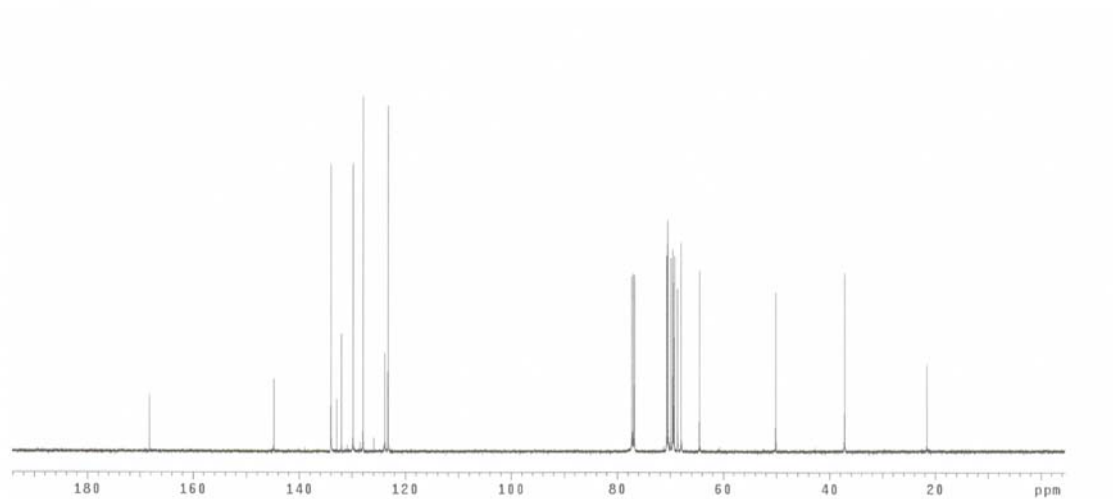

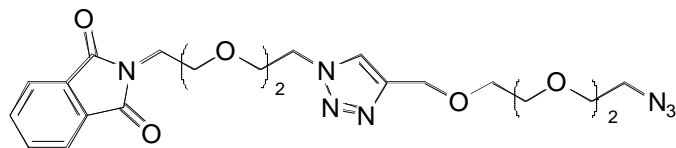

6

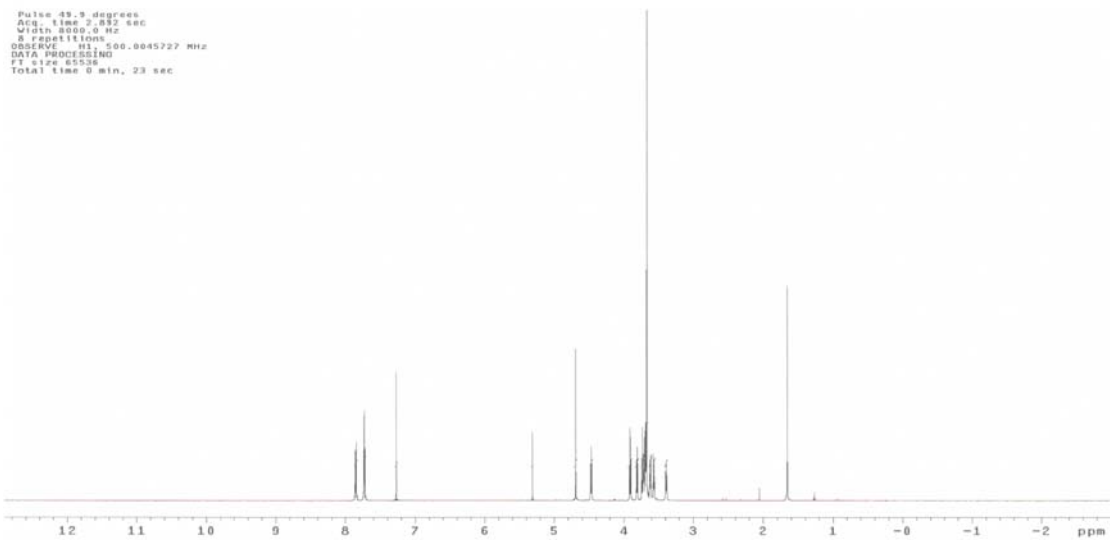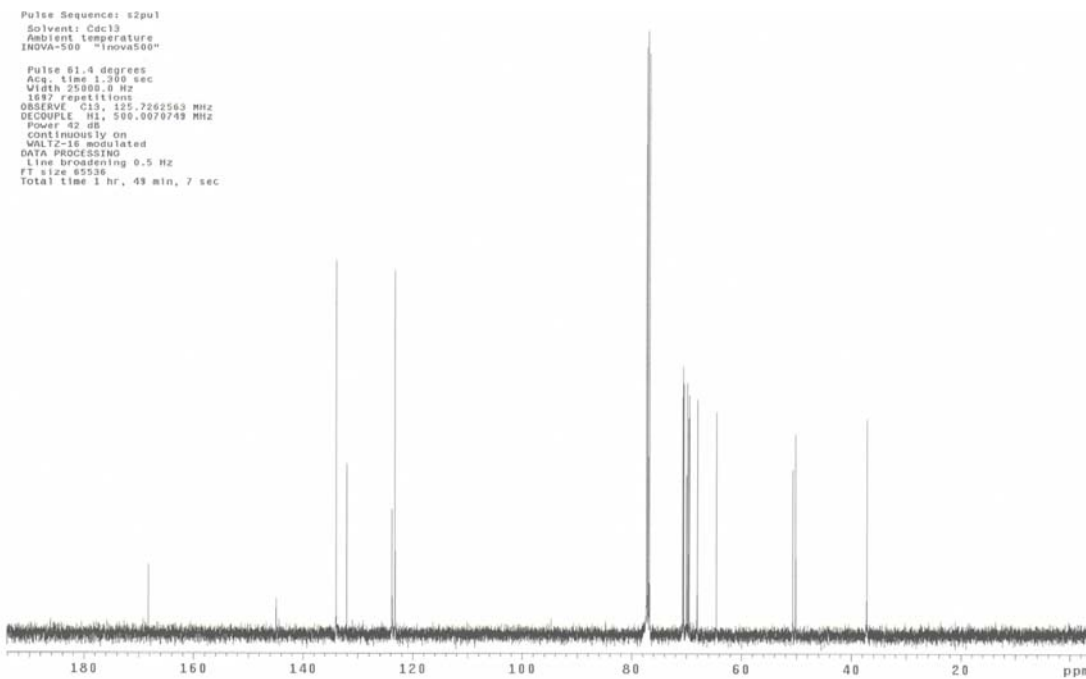



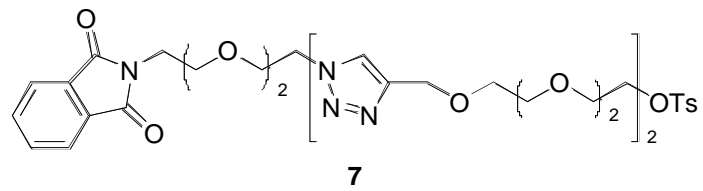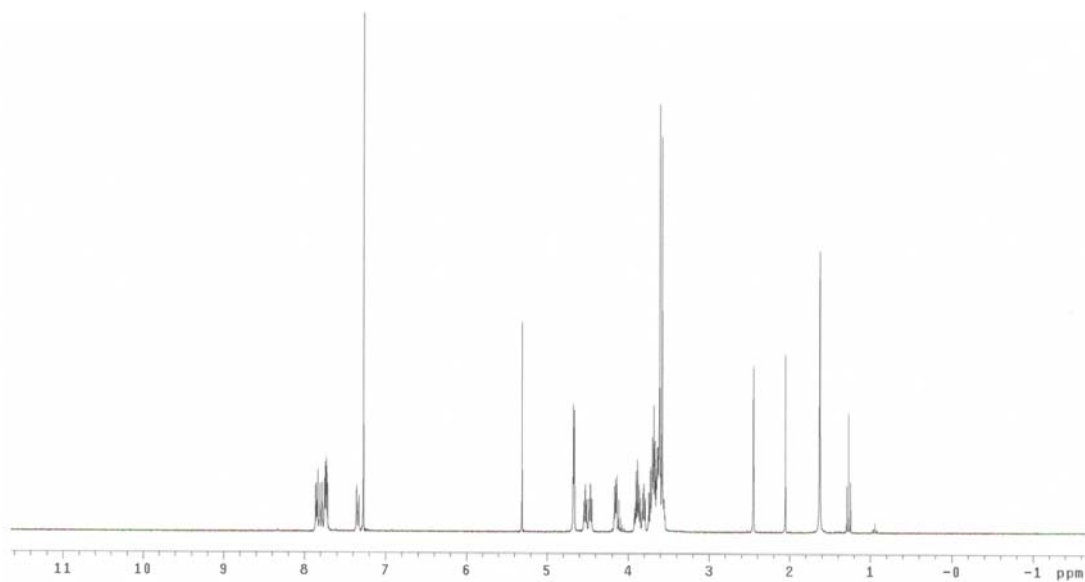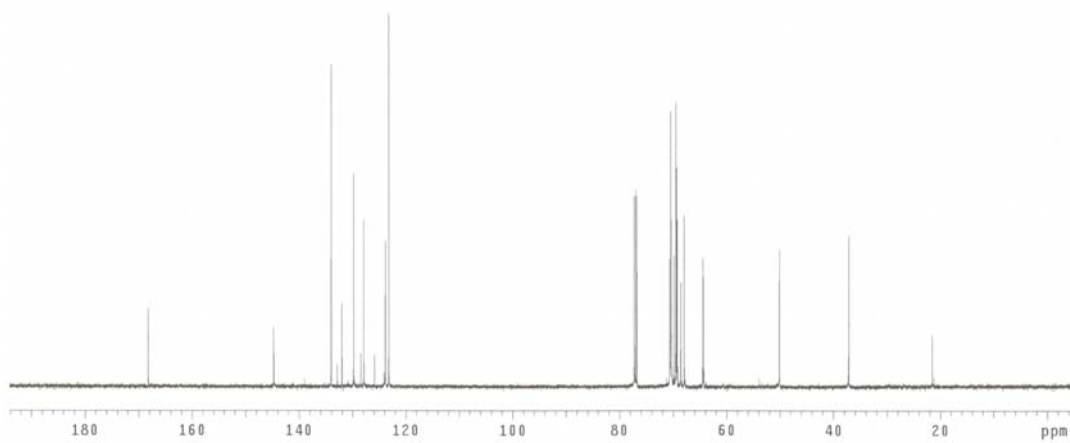

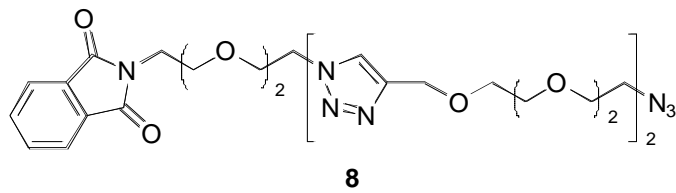

836\_H  
 Pulse Sequence: s2pu1  
 Solvent: cdcl3  
 Ambient Temperature  
 INOVA-500 "inova500"  
 Pulse 49.9 degree  
 Dec. time 2.032 sec  
 Width 8000.0 Hz  
 8 repetitions  
 OBSERVE: H1, 500.0045747 MHz  
 DATA PROCESSING  
 FT size 85538  
 Total time 0 min, 23 sec

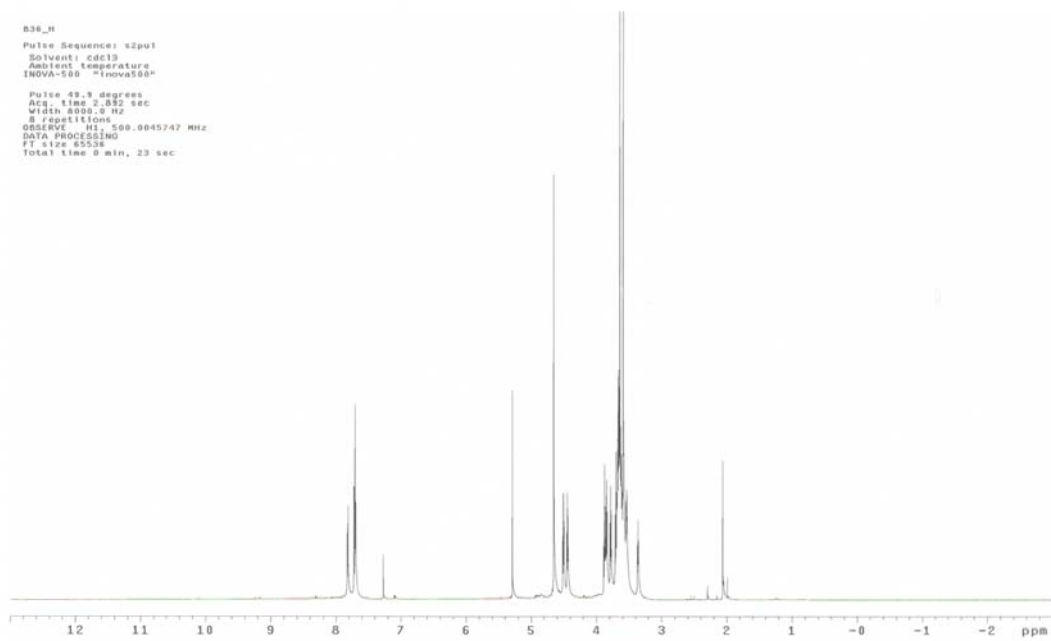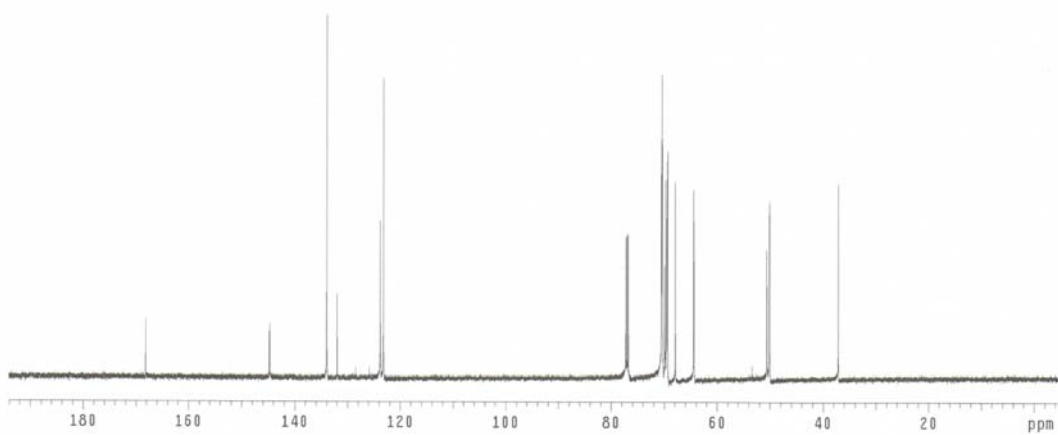

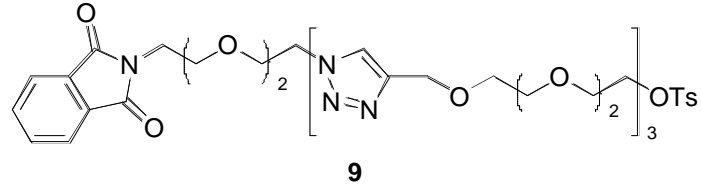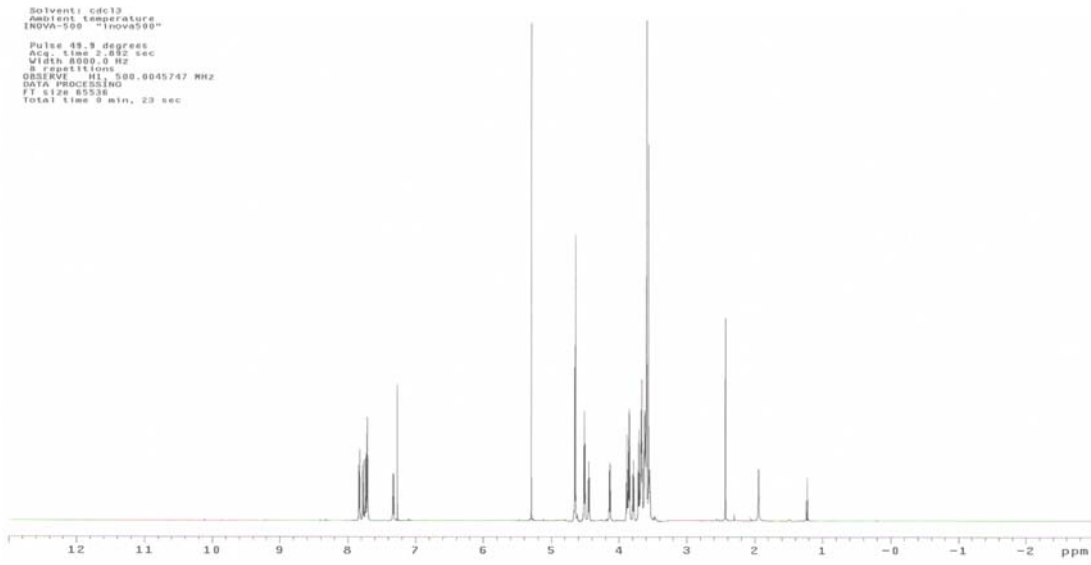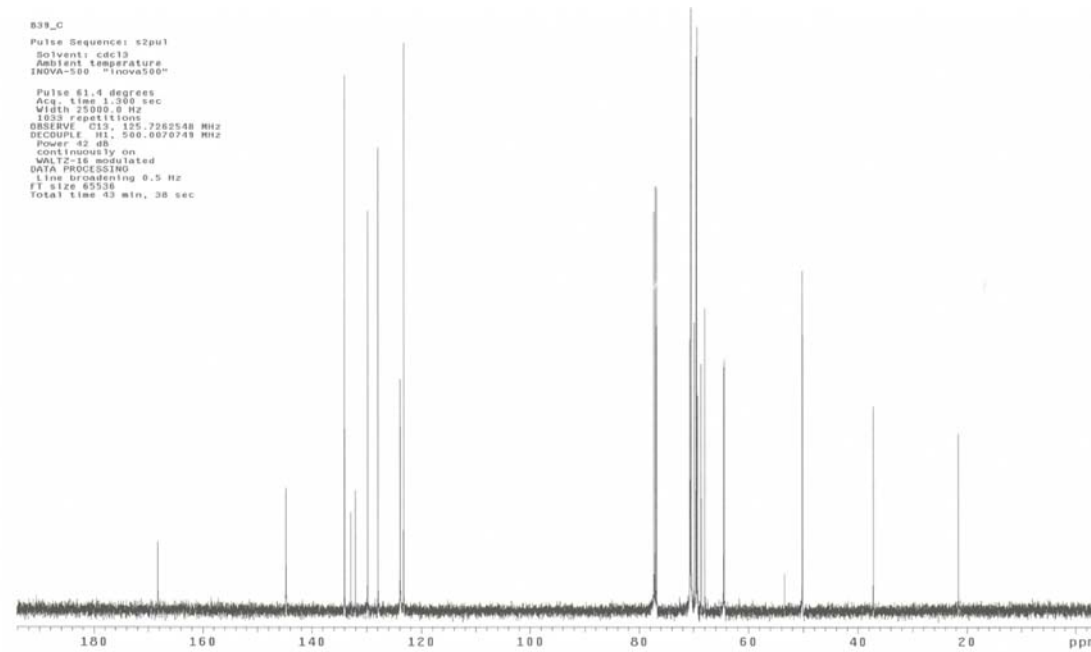

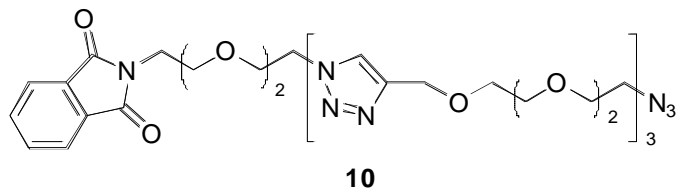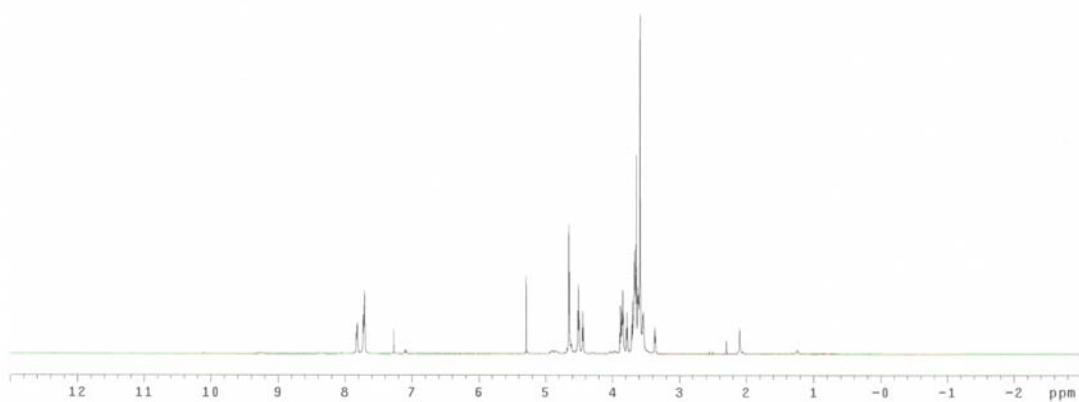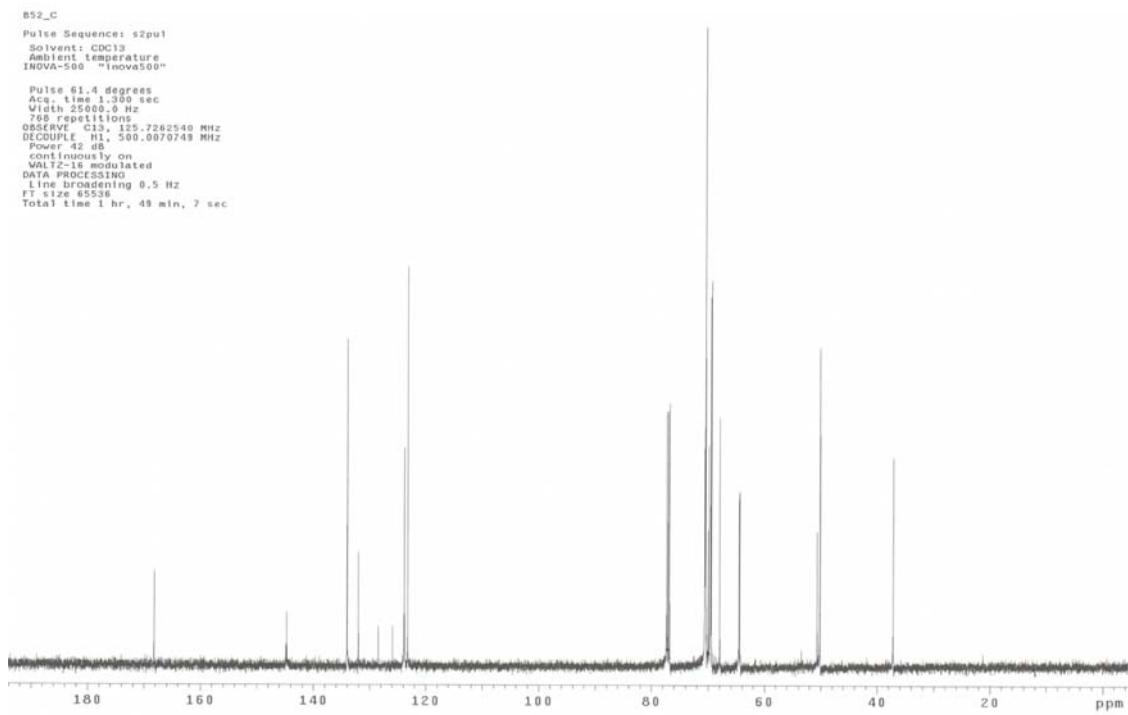

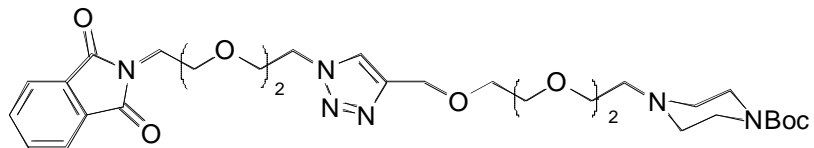

11

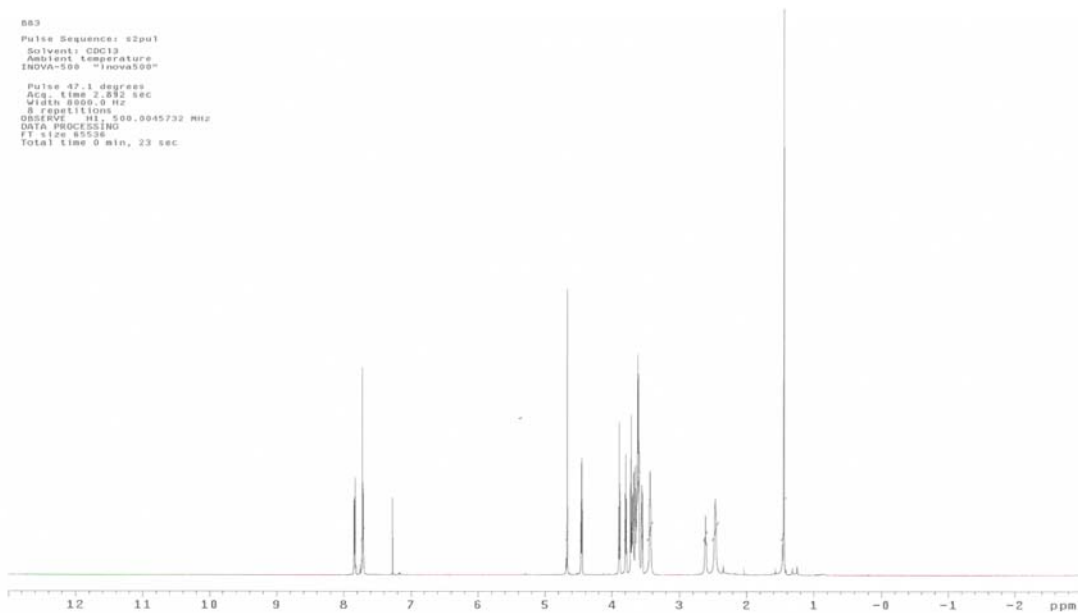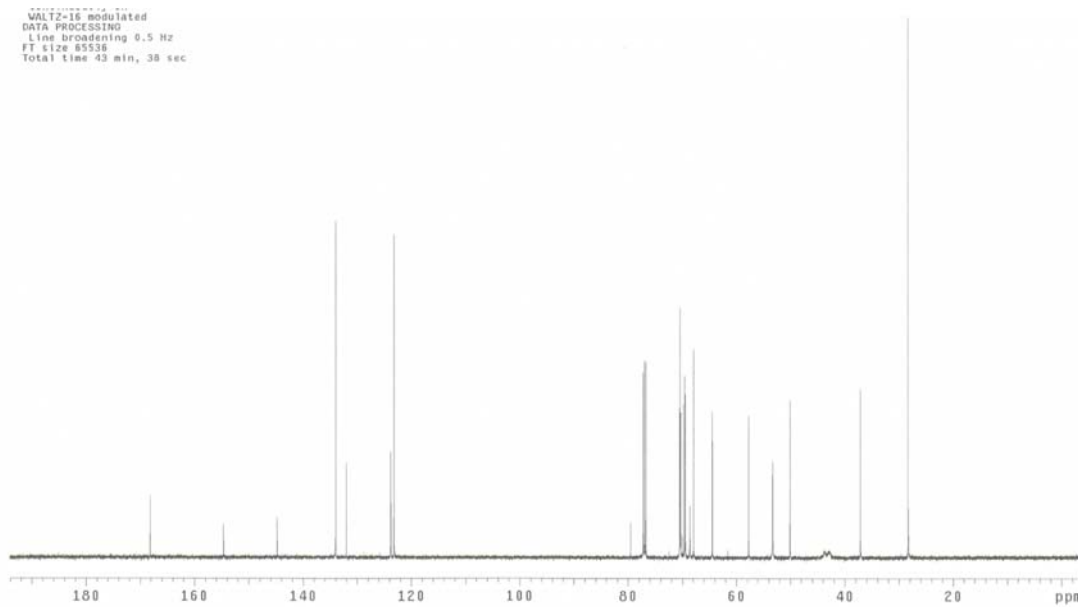

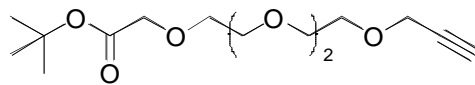

12

DATA PROCESSING  
FT size 32766  
Total time 1 min, 0 sec

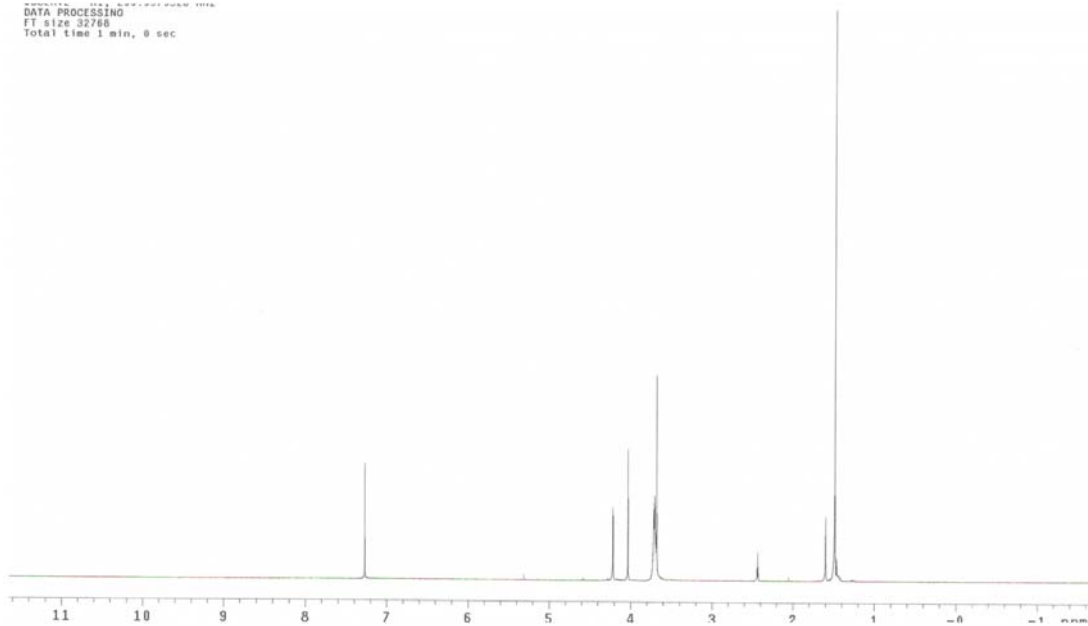

1453 repetitions  
OBSERVE C13, 125.7262533 MHz  
DECOUPLE H1, 500.0070749 MHz  
Power 42 dB  
continuously on  
WALTZ-16 modulated  
DATA PROCESSING  
Line broadening 0.5 Hz  
FT size 65538  
Total time 43 min, 38 sec

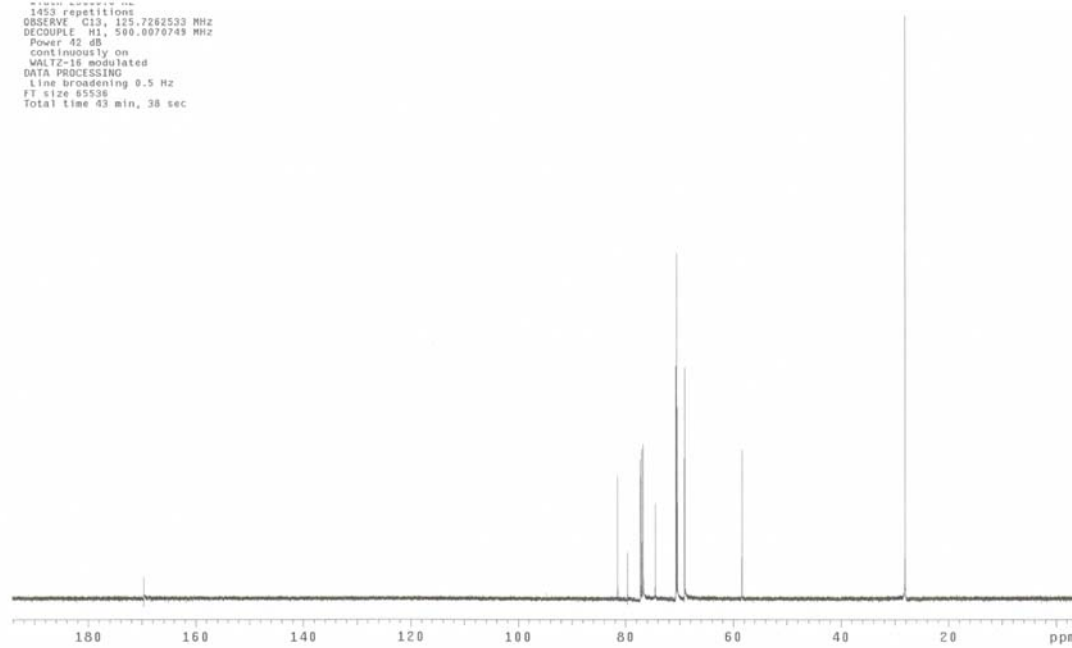

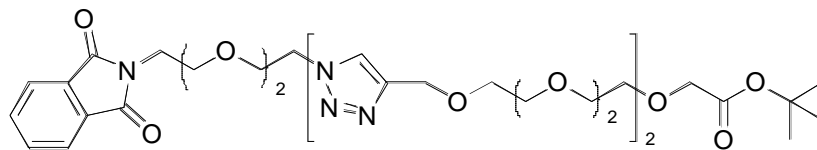

13

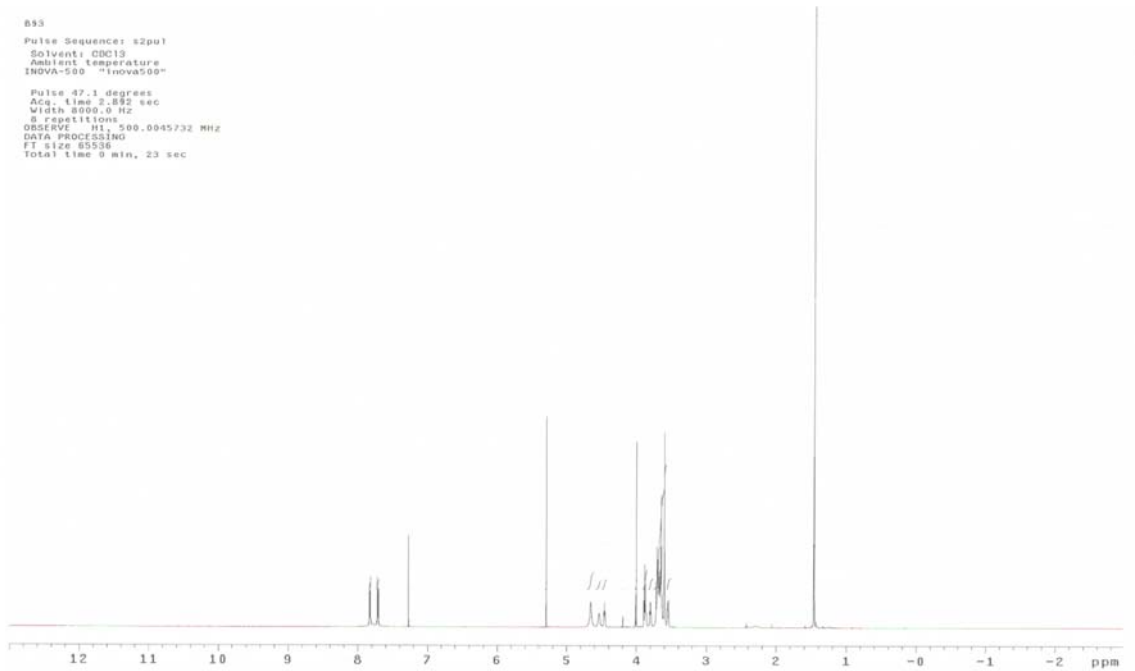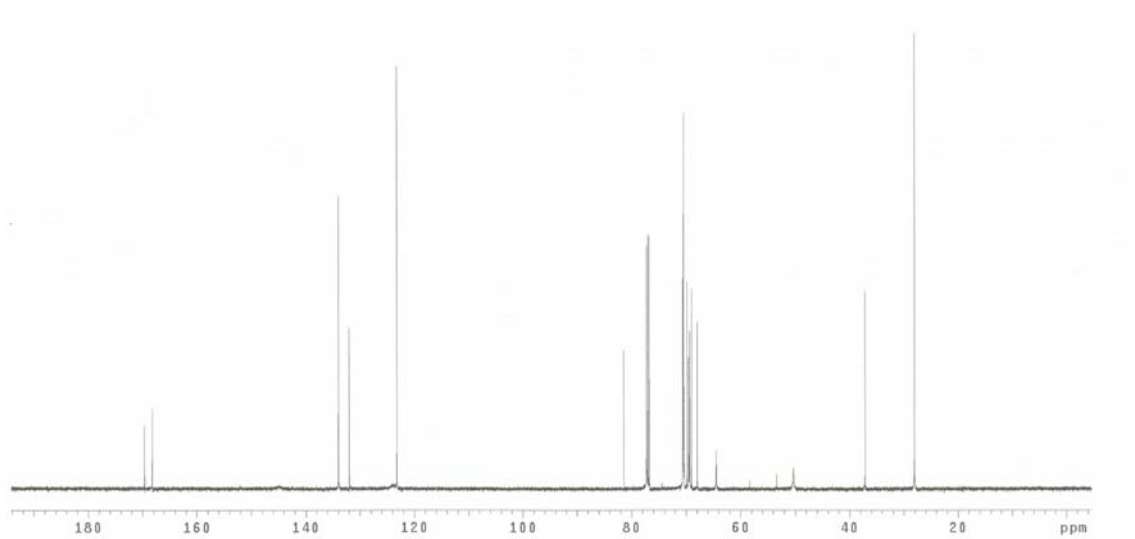

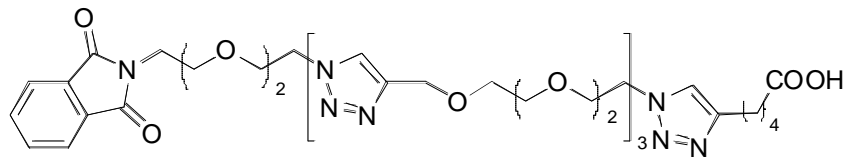

14

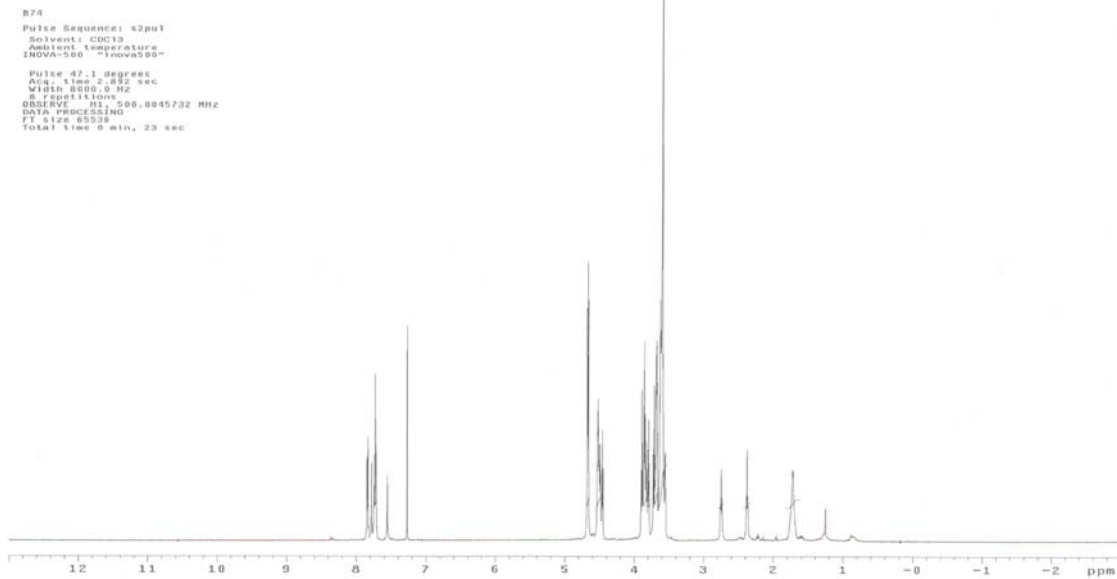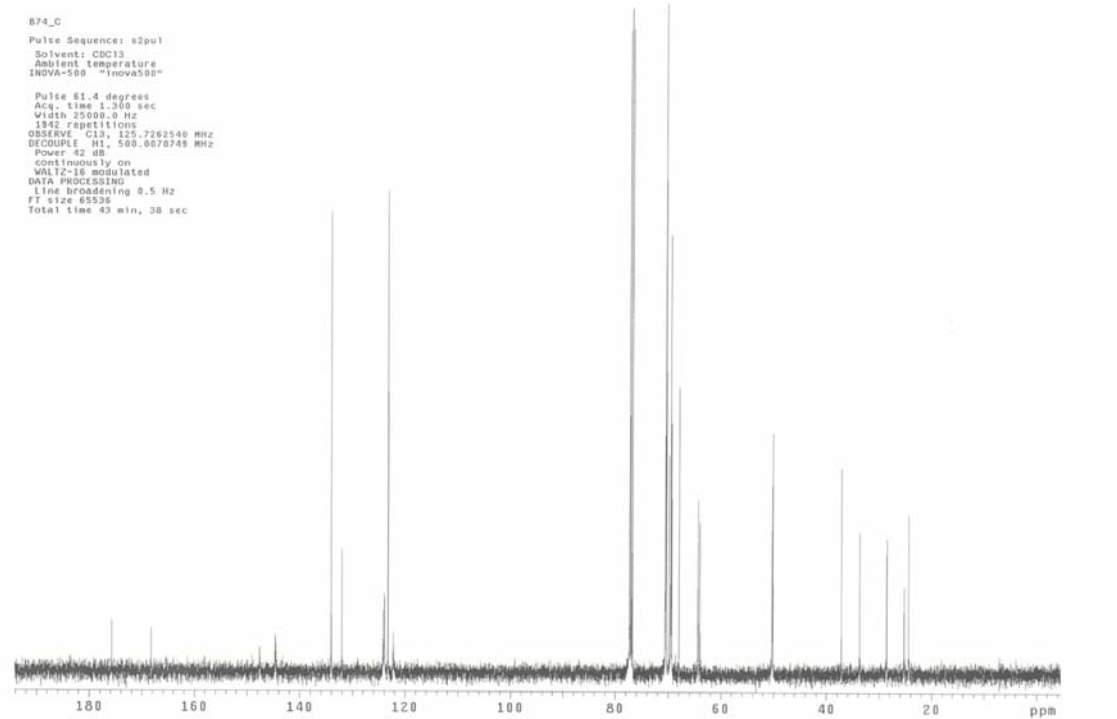

Supplement: b518061a.pdf [file b518061a.pdf]
